# Supplementary material for: Increasing Prevalence of Myopia in Europe and the Impact of Education
Source: PubMed Central journal article supplement (PMC4504030; doi:10.1016/j.ophtha.2015.03.018), 2015-07
Supplement: mmc3.pdf [file mmc3.pdf]

## Members of the European Eye Epidemiology (E<sup>3</sup>) Consortium

|                            |                                                                      |
|----------------------------|----------------------------------------------------------------------|
| Niyazi Acar                | Inra-University of Burgundy, Dijon, France                           |
| Eleftherios Anastosopoulos | University of Thessaloniki, Thessaloniki, Greece                     |
| Augusto Azuara-Blanco      | Queen's University, Belfast, UK                                      |
| Arthur Bergen              | Netherlands Institute for Neurosciences-KNAW, Amsterdam, Netherlands |
| Geir Bertelsen             | University of Tromso, Tromso, Norway                                 |
| Christine Binquet          | University Hospital of Dijon, Dijon, France                          |
| Alan Bird                  | Moorfield's Eye Hospital, London, UK                                 |
| Lionel Brétillon           | Inra-University of Burgundy, Dijon, France                           |
| Alain Bron                 | University Hospital of Dijon, Dijon, France                          |
| Gabrielle Buitendijk       | Erasmus Medical Center, Rotterdam, Netherlands                       |
| Maria Luz Cachulo          | AIBILI/CHUC, Coimbra, Portugal                                       |
| Usha Chakravarthy          | Queen's University, Belfast, UK                                      |
| Michelle Chan              | UCL Institute of Ophthalmology, London, UK                           |
| Petrus Chang               | University of Bonn, Bonn, Germany                                    |
| Annemarie Colijn           | Erasmus Medical Center, Rotterdam, Netherlands                       |
| Audrey Cougnard-Grégoire   | University of Bordeaux Segalen, Bordeaux, France                     |
| Catherine Creuzot-Garcher  | University Hospital of Dijon, Dijon, France                          |
| José Cunha-Vaz             | AIBILI/CHUC, Coimbra, Portugal                                       |
| Vincent Daien              | Inserm U1061, Montpellier, France                                    |
| Gabor Deak                 | Medical University of Vienna, Vienna, Austria                        |
| Cécile Delcourt            | University of Bordeaux Segalen, Bordeaux, France                     |
| Marie-Noëlle Delyfer       | University of Bordeaux Segalen, Bordeaux, France                     |
| Anneke den Hollander       | Radboud University, Nijmegen, Netherlands                            |
| Martha Dietzel             | University of Muenster, Muenster, Germany                            |
| Maja Gran Erke             | University of Tromso, Tromso, Norway                                 |
| Sascha Fauser              | University Eye Hospital, Cologne, Germany                            |
| Robert Finger              | University of Bonn, Bonn, Germany                                    |
| Astrid Fletcher            | London School of Hygiene and Tropical Medicine, London, UK           |
| Paul Foster                | UCL Institute of Ophthalmology, London, UK                           |
| Panayiota Founti           | University of Thessaloniki, Thessaloniki, Greece                     |
| Arno Göbel                 | University of Bonn, Bonn, Germany                                    |
| Theo Gorgels               | Netherlands Institute for Neurosciences-KNAW, Amsterdam, Netherlands |
| Jakob Grauslund            | University of Southern Denmark, Odense, Denmark                      |
| Franz Grus                 | University Medical Center Mainz, Mainz, Germany                      |
| Christopher Hammond        | King's College, London, UK                                           |
| Catherine Helmer           | University of Bordeaux Segalen, Bordeaux, France                     |
| Hans-Werner Hense          | University of Muenster, Muenster, Germany                            |
| Manuel Hermann             | University Eye Hospital, Cologne, Germany                            |
| René Hoehn                 | University Medical Center, Mainz, Germany                            |
| Ruth Hogg                  | Queen's University, Belfast, UK                                      |
| Frank Holz                 | University of Bonn, Bonn, Germany                                    |
| Carel Hoyng                | Radboud University, Nijmegen, Netherlands                            |
| Nomdo Jansonius            | Erasmus Medical Center, Rotterdam, Netherlands                       |
| Sarah Janssen              | Netherlands Institute for Neurosciences-KNAW, Amsterdam, Netherlands |
| Anthony Khawaja            | UCL Institute of Ophthalmology, London, UK                           |
| Caroline Klaver            | Erasmus Medical Center, Rotterdam, Netherlands                       |
| Jean-François Korobelnik   | University of Bordeaux Segalen, Bordeaux, France                     |
| Julia Lamparter            | University Medical Center Mainz, Mainz, Germany                      |
| Mélanie Le Goff            | University of Bordeaux Segalen, Bordeaux, France                     |

|                             |                                                  |
|-----------------------------|--------------------------------------------------|
| Sergio Leal                 | AIBILI/CHUC, Coimbra, Portugal                   |
| Yara Lechanteur             | Radboud University, Nijmegen, Netherlands        |
| Terho Lehtimäki             | Pirkanmaa Hospital District, Tampere, Finland    |
| Andrew Lotery               | University of Southampton, Southampton, UK       |
| Irene Leung                 | Moorfield's Eye Hospital, London, UK             |
| Matthias Mauschitz          | University of Bonn, Bonn, Germany                |
| Bénédicte Merle             | University of Bordeaux Segalen, Bordeaux, France |
| Verena Meyer zu Westrup     | University of Muenster, Muenster, Germany        |
| Edoardo Midena              | University of Padova, Padova, Italy              |
| Stefania Miotto             | University of Padova, Padova, Italy              |
| Alireza Mirshahi            | University Medical Center, Mainz, Germany        |
| Sadek Mohan-Säid            | Institut de la Vision, Paris, France             |
| Alyson Muldrew              | Queen's University, Belfast, UK                  |
| Michael Mueller             | Pirkanmaa Hospital District, Tampere, Finland    |
| Sandrina Nunes              | AIBILI/CHUC, Coimbra, Portugal                   |
| Konrad Oexle                | Institute of Human Genetics, Munich, Germany     |
| Tunde Peto                  | Moorfield's Eye Hospital, London, UK             |
| Stefano Piermarocchi        | University of Padova, Padova, Italy              |
| Elena Prokofyeva            | Inserm U1018, Paris, France                      |
| Jugnoo Rahi                 | UCL Institute of Ophthalmology, London, UK       |
| Olli Raitakari              | Pirkanmaa Hospital District, Tampere, Finland    |
| Luisa Ribeiro               | AIBILI/CHUC, Coimbra, Portugal                   |
| Marie-Bénédicte Rougier     | University of Bordeaux Segalen, Bordeaux, France |
| José Sahel                  | Institut de la Vision, Paris, France             |
| Aggeliki Salonikiou         | University of Thessaloniki, Thessaloniki, Greece |
| Clarisa Sanchez             | Radboud University, Nijmegen, Netherlands        |
| Steffen Schmitz-Valckenberg | University of Bonn, Bonn, Germany                |
| Cédric Schweitzer           | University of Bordeaux Segalen, Bordeaux, France |
| Tatiana Segato              | University of Padova, Padova, Italy              |
| Jasmin Shehata              | Medical University of Vienna, Vienna, Austria    |
| Rufino Silva                | AIBILI/CHUC, Coimbra, Portugal                   |
| Giuliana Silvestri          | Queen's University, Belfast, UK                  |
| Christian Simader           | Medical University of Vienna, Vienna, Austria    |
| Eric Souied                 | University Hospital of Créteil, Créteil, France  |
| Henriet Springelkamp        | Erasmus Medical Center, Rotterdam, Netherlands   |
| Robyn Tapp                  | Pirkanmaa Hospital District, Tampere, Finland    |
| Fotis Topouzis              | University of Thessaloniki, Thessaloniki, Greece |
| Virginie Verhoeven          | Erasmus Medical Center, Rotterdam, Netherlands   |
| Therese Von Hanno           | University of Tromso, Tromso, Norway             |
| Stela Vujosevic             | University of Padova, Padova, Italy              |
| Katie Williams              | King's College London, London, UK                |
| Ute Wolf-Schnurrbusch       | University of Bern, Bern, Switzerland            |
| Christian Wolfram           | University Medical Center, Mainz, Germany        |
| Jennifer Yip                | UCL Institute of Ophthalmology, London, UK       |
| Jennyfer Zerbib             | University Hospital of Créteil, Créteil, France  |
| Isabella Zwiener            | University Medical Center, Mainz, Germany        |
